# Supplementary material for: SPARC Overexpression Promotes Liver Cancer Cell Proliferation and Tumor Growth
Source: Front Mol Biosci. 2021 Nov 29;8:775743. doi: 10.3389/fmolb.2021.775743 (PMC8668270; doi:10.3389/fmolb.2021.775743)
Supplement: Supplementary file 1 [file Table2.XLSX]

## Sheet: SPARC positively related genes
Target Gene/Attribute	Person Correlation	P-value	FDR (BH)
SPARC	1	1e-139	1e-135
COL4A2	0.9098	3.966e-139	3.949e-135
PXDN	0.8934	8.207e-127	5.448e-123
COL4A1	0.8822	1.813e-119	9.024e-116
COL3A1	0.88	3.827e-118	1.524e-114
LHFP	0.8757	1.426e-115	4.732e-112
JAM3	0.8705	1.43e-112	4.069e-109
GPR124	0.8662	3.238e-110	8.06e-107
COL6A3	0.8598	8.175e-107	1.809e-103
COL1A2	0.8582	5.475e-106	1.09e-102
MAP1B	0.8549	2.383e-104	4.314e-101
TGFB1I1	0.8539	7.512e-104	1.247e-100
COL12A1	0.853	2.04e-103	3.126e-100
FBN1	0.8524	3.795e-103	5.399e-100
HEPH	0.8519	6.822e-103	9.057e-100
ADAMTS7	0.8516	9.506e-103	1.183e-99
ANTXR1	0.8461	3.894e-100	4.562e-97
ESAM	0.8419	3.359e-98	3.717e-95
LRRC32	0.8408	1.043e-97	1.093e-94
CD93	0.8354	2.567e-95	2.556e-92
EDNRA	0.8341	8.984e-95	8.52e-92
F2R	0.8334	1.712e-94	1.55e-91
LOXL2	0.8291	1.134e-92	9.819e-90
MMP2	0.8257	2.775e-91	2.303e-88
COL6A2	0.8234	2.437e-90	1.941e-87
COL5A1	0.8206	3.103e-89	2.377e-86
RHOJ	0.8196	7.681e-89	5.666e-86
CALHM2	0.816	1.734e-87	1.233e-84
VIM	0.8145	6.575e-87	4.515e-84
FAM26E	0.8144	7.287e-87	4.838e-84
IGFBP7	0.8113	1.063e-85	6.828e-83
NOTCH3	0.8099	3.48e-85	2.166e-82
MXRA5	0.8094	5.293e-85	3.194e-82
DPYSL3	0.8071	3.747e-84	2.195e-81
MRVI1	0.8067	5.078e-84	2.889e-81
CACNA1C	0.805	2.122e-83	1.174e-80
MCAM	0.8043	3.536e-83	1.903e-80
COL1A1	0.8023	1.863e-82	9.763e-80
FSTL1	0.8017	3.069e-82	1.567e-79
SYT11	0.8002	1.045e-81	5.202e-79
HDGFRP3	0.7996	1.612e-81	7.828e-79
DCLK1	0.799	2.545e-81	1.207e-78
TSHZ3	0.798	6.041e-81	2.798e-78
NID2	0.7972	1.124e-80	5.087e-78
PCDH12	0.7935	1.965e-79	8.695e-77
OLFML2A	0.7934	2.102e-79	9.102e-77
MEF2C	0.7908	1.496e-78	6.341e-76
TCF4	0.7899	3.033e-78	1.258e-75
ZNF521	0.7882	1.091e-77	4.435e-75
ARHGEF17	0.7875	1.912e-77	7.611e-75

## Sheet: negatively related genes
Target Gene/Attribute	Person Correlation	P-value	FDR (BH)
HNF1A	-0.4883	4.945e-23	1.12e-21
GOLGA2B	-0.4369	2.927e-18	5.009e-17
CDK5RAP3	-0.4248	3.016e-17	4.839e-16
C17orf58	-0.4192	8.577e-17	1.322e-15
MLXIPL	-0.4116	3.411e-16	5.044e-15
FOXA2	-0.411	3.803e-16	5.61e-15
RFNG	-0.411	3.81e-16	5.617e-15
PCYT2	-0.4041	1.302e-15	1.855e-14
LOC100130015	-0.3998	2.754e-15	3.817e-14
LCN12	-0.3914	1.149e-14	1.526e-13
STRA13	-0.3876	2.192e-14	2.822e-13
TCEA3	-0.387	2.419e-14	3.098e-13
BNIP3	-0.3865	2.636e-14	3.363e-13
PFDN6	-0.3839	4.032e-14	5.07e-13
MPST	-0.3838	4.09e-14	5.139e-13
NPRL2	-0.3833	4.427e-14	5.548e-13
MST1P2	-0.383	4.656e-14	5.828e-13
DPY30	-0.3802	7.344e-14	9.006e-13
GCAT	-0.3784	9.838e-14	1.195e-12
GAS2	-0.3728	2.392e-13	2.812e-12
LOC440925	-0.371	3.178e-13	3.694e-12
IFRD2	-0.3697	3.91e-13	4.514e-12
SS18L2	-0.3666	6.345e-13	7.167e-12
PRODH2	-0.3662	6.754e-13	7.586e-12
TF	-0.3623	1.219e-12	1.34e-11
C7orf55	-0.3617	1.336e-12	1.461e-11
DUS1L	-0.3593	1.922e-12	2.072e-11
POLDIP2	-0.3582	2.26e-12	2.419e-11
PROC	-0.3556	3.358e-12	3.552e-11
LOC100287227	-0.3549	3.743e-12	3.94e-11
MGC70857	-0.3546	3.903e-12	4.104e-11
TMEM180	-0.3534	4.659e-12	4.871e-11
HEXDC	-0.3531	4.899e-12	5.098e-11
VSNL1	-0.353	4.936e-12	5.134e-11
LOC285733	-0.3526	5.275e-12	5.472e-11
HSD17B3	-0.3521	5.612e-12	5.806e-11
SFXN5	-0.3517	5.967e-12	6.157e-11
EBP	-0.3517	5.988e-12	6.175e-11
C10orf75	-0.3515	6.176e-12	6.353e-11
LRRC45	-0.3512	6.462e-12	6.62e-11
NT5C3L	-0.3508	6.81e-12	6.969e-11
ASPSCR1	-0.3499	7.744e-12	7.885e-11
DHRS13	-0.3489	8.948e-12	9.054e-11
EIF2B4	-0.348	1.031e-11	1.037e-10
CCL15	-0.3478	1.06e-11	1.065e-10
MMAB	-0.3467	1.232e-11	1.231e-10
POP5	-0.3461	1.342e-11	1.338e-10
C19orf73	-0.3458	1.41e-11	1.404e-10
CABC1	-0.3457	1.422e-11	1.413e-10
SLC2A4RG	-0.3457	1.427e-11	1.417e-10

## Sheet: GO_BP
Category	Term	GOID	Count	%	PValue	Genes	List Total	Pop Hits	Pop Total	Fold Enrichment	Bonferroni	Benjamini	FDR
GOTERM_BP_DIRECT	GO:0030198~extracellular matrix organization	GO:0030198	14	16.092	4.78264e-12	SPARC, OLFML2A, NID2, COL1A1, COL3A1, COL1A2, COL4A2, COL5A1, COL4A1, COL6A2, PXDN, COL6A3, JAM3, FBN1	78	196	16792	15.3773	2.99392e-09	2.99393e-09	2.96524e-09
GOTERM_BP_DIRECT	GO:0030574~collagen catabolic process	GO:0030574	10	11.4943	1.24491e-11	COL1A1, COL3A1, COL1A2, COL4A2, COL5A1, COL4A1, MMP2, COL6A2, COL12A1, COL6A3	78	64	16792	33.6378	7.79317e-09	3.89658e-09	3.85923e-09
GOTERM_BP_DIRECT	GO:0030199~collagen fibril organization	GO:0030199	6	6.89655	9.05901e-07	COL1A1, COL3A1, COL1A2, COL5A1, COL12A1, LOXL2	78	39	16792	33.1203	0.000566933	0.000189031	0.000187219
GOTERM_BP_DIRECT	GO:0001568~blood vessel development	GO:0001568	5	5.74713	2.67987e-05	COL1A1, MEF2C, COL1A2, COL5A1, ANTXR1	78	38	16792	28.3266	0.0166363	0.004194	0.00415381
GOTERM_BP_DIRECT	GO:0071230~cellular response to amino acid stimulus	GO:0071230	5	5.74713	6.27639e-05	COL1A1, COL3A1, COL1A2, COL4A1, MMP2	78	47	16792	22.9023	0.0385295	0.00785804	0.00778272
GOTERM_BP_DIRECT	GO:0007155~cell adhesion	GO:0007155	10	11.4943	0.000244742	COL1A1, COL5A1, TGFB1I1, MCAM, COL6A2, COL12A1, COL6A3, IGFBP7, NID2, LOXL2	78	459	16792	4.69024	0.142065	0.0255347	0.02529
GOTERM_BP_DIRECT	GO:0001501~skeletal system development	GO:0001501	6	6.89655	0.000414497	COL1A1, COL3A1, EBP, COL1A2, COL12A1, FBN1	78	137	16792	9.42841	0.228585	0.0370679	0.0367126
GOTERM_BP_DIRECT	GO:0071560~cellular response to transforming growth factor beta stimulus	GO:0071560	4	4.5977	0.00146769	COL1A1, MEF2C, COL4A2, FBN1	78	49	16792	17.574	0.60126	0.106109	0.105092
GOTERM_BP_DIRECT	GO:0007507~heart development	GO:0007507	6	6.89655	0.00152553	MEF2C, COL3A1, EDNRA, SPARC, CACNA1C, FBN1	78	183	16792	7.05843	0.615462	0.106109	0.105092
GOTERM_BP_DIRECT	GO:0070208~protein heterotrimerization	GO:0070208	3	3.44828	0.00182243	COL1A1, COL1A2, COL6A2	78	14	16792	46.1319	0.680783	0.114084	0.112991
GOTERM_BP_DIRECT	GO:0050900~leukocyte migration	GO:0050900	5	5.74713	0.00238498	COL1A1, PROC, COL1A2, ESAM, JAM3	78	122	16792	8.82303	0.775702	0.135727	0.134426
GOTERM_BP_DIRECT	GO:0035987~endodermal cell differentiation	GO:0035987	3	3.44828	0.00676364	COL4A2, MMP2, COL12A1	78	27	16792	23.9202	0.985713	0.352836	0.349455
GOTERM_BP_DIRECT	GO:0045893~positive regulation of transcription, DNA-templated	GO:0045893	8	9.1954	0.00927169	COL1A1, MLXIPL, MEF2C, TGFB1I1, F2R, TCF4, HNF1A, FOXA2	78	515	16792	3.34419	0.997065	0.446467	0.442188
GOTERM_BP_DIRECT	GO:0042593~glucose homeostasis	GO:0042593	4	4.5977	0.0112008	MLXIPL, ASPSCR1, HNF1A, FBN1	78	101	16792	8.52602	0.999134	0.500834	0.496034
GOTERM_BP_DIRECT	GO:0030168~platelet activation	GO:0030168	4	4.5977	0.0158573	COL1A1, COL3A1, COL1A2, F2R	78	115	16792	7.48807	0.999955	0.661777	0.655434
GOTERM_BP_DIRECT	GO:0043434~response to peptide hormone	GO:0043434	3	3.44828	0.0173376	COL1A1, EIF2B4, SPARC	78	44	16792	14.6783	0.999982	0.670848	0.664418
GOTERM_BP_DIRECT	GO:0061333~renal tubule morphogenesis	GO:0061333	2	2.29885	0.0182179	MEF2C, COL4A1	78	4	16792	107.641	0.99999	0.670848	0.664418
GOTERM_BP_DIRECT	GO:0009408~response to heat	GO:0009408	3	3.44828	0.0204315	EIF2B4, TGFB1I1, IGFBP7	78	48	16792	13.4551	0.999998	0.710563	0.703752
GOTERM_BP_DIRECT	GO:0001957~intramembranous ossification	GO:0001957	2	2.29885	0.0272036	COL1A1, MMP2	78	6	16792	71.7607	1	0.810927	0.803155
GOTERM_BP_DIRECT	GO:0038063~collagen-activated tyrosine kinase receptor signaling pathway	GO:0038063	2	2.29885	0.0272036	COL4A2, COL4A1	78	6	16792	71.7607	1	0.810927	0.803155
GOTERM_BP_DIRECT	GO:0032964~collagen biosynthetic process	GO:0032964	2	2.29885	0.0272036	COL1A1, COL5A1	78	6	16792	71.7607	1	0.810927	0.803155
GOTERM_BP_DIRECT	GO:0016525~negative regulation of angiogenesis	GO:0016525	3	3.44828	0.0328753	SPARC, COL4A2, TCF4	78	62	16792	10.4169	1	0.935453	0.926487
GOTERM_BP_DIRECT	GO:0060346~bone trabecula formation	GO:0060346	2	2.29885	0.0361082	COL1A1, MMP2	78	8	16792	53.8205	1	0.941821	0.932794
GOTERM_BP_DIRECT	GO:0071711~basement membrane organization	GO:0071711	2	2.29885	0.0361082	COL4A1, NID2	78	8	16792	53.8205	1	0.941821	0.932794
GOTERM_BP_DIRECT	GO:0009749~response to glucose	GO:0009749	3	3.44828	0.0389157	EIF2B4, COL6A2, HNF1A	78	68	16792	9.49774	1	0.97445	0.96511
GOTERM_BP_DIRECT	GO:0043589~skin morphogenesis	GO:0043589	2	2.29885	0.0405302	COL1A1, COL1A2	78	9	16792	47.8405	1	0.975843	0.966489
GOTERM_BP_DIRECT	GO:0001666~response to hypoxia	GO:0001666	4	4.5977	0.0445369	EDNRA, BNIP3, MMP2, LOXL2	78	172	16792	5.00656	1	1	0.992
GOTERM_BP_DIRECT	GO:0007596~blood coagulation	GO:0007596	4	4.5977	0.0525303	COL1A1, PROC, COL1A2, F2R	78	184	16792	4.68004	1	1	0.992
GOTERM_BP_DIRECT	GO:0043206~extracellular fibril organization	GO:0043206	2	2.29885	0.0536766	COL3A1, COL5A1	78	12	16792	35.8803	1	1	0.992
GOTERM_BP_DIRECT	GO:0055114~oxidation-reduction process	GO:0055114	7	8.04598	0.0541621	DHRS13, HEPH, PXDN, HSD17B3, DUS1L, PRODH2, LOXL2	78	592	16792	2.54556	1	1	0.992
GOTERM_BP_DIRECT	GO:0007160~cell-matrix adhesion	GO:0007160	3	3.44828	0.0641831	COL3A1, NID2, JAM3	78	90	16792	7.17607	1	1	0.992
GOTERM_BP_DIRECT	GO:0009653~anatomical structure morphogenesis	GO:0009653	3	3.44828	0.0666969	MLXIPL, MCAM, F2R	78	92	16792	7.02007	1	1	0.992
GOTERM_BP_DIRECT	GO:0048663~neuron fate commitment	GO:0048663	2	2.29885	0.0751932	NOTCH3, ZNF521	78	17	16792	25.3273	1	1	0.992
GOTERM_BP_DIRECT	GO:0055093~response to hyperoxia	GO:0055093	2	2.29885	0.0751932	COL1A1, BNIP3	78	17	16792	25.3273	1	1	0.992
GOTERM_BP_DIRECT	GO:0030193~regulation of blood coagulation	GO:0030193	2	2.29885	0.0751932	F2R, FOXA2	78	17	16792	25.3273	1	1	0.992
GOTERM_BP_DIRECT	GO:0001525~angiogenesis	GO:0001525	4	4.5977	0.0828375	COL4A2, MCAM, MMP2, JAM3	78	223	16792	3.86156	1	1	0.992
GOTERM_BP_DIRECT	GO:0071356~cellular response to tumor necrosis factor	GO:0071356	3	3.44828	0.0906922	COL1A1, ADAMTS7, CCL15	78	110	16792	5.87133	1	1	0.992

## Sheet: GO_CC
Category	Term	GOID	Count	%	PValue	Genes	List Total	Pop Hits	Pop Total	Fold Enrichment	Bonferroni	Benjamini	FDR
GOTERM_CC_DIRECT	GO:0031012~extracellular matrix	GO:0031012	18	20.6897	1.51387e-14	CD93, TGFB1I1, MMP2, COL12A1, NID2, LOXL2, COL1A1, COL3A1, COL1A2, COL4A2, COL5A1, COL4A1, COL6A2, PXDN, COL6A3, IGFBP7, VIM, FBN1	83	296	18224	13.352	2.24976e-12	2.25567e-12	2.17997e-12
GOTERM_CC_DIRECT	GO:0005788~endoplasmic reticulum lumen	GO:0005788	11	12.6437	1.47691e-08	COL1A1, COL3A1, PROC, COL1A2, COL4A2, COL5A1, COL4A1, COL6A2, COL12A1, COL6A3, ADAMTS7	83	192	18224	12.5793	2.2006e-06	1.1003e-06	1.06338e-06
GOTERM_CC_DIRECT	GO:0005578~proteinaceous extracellular matrix	GO:0005578	10	11.4943	3.23019e-06	SPARC, COL1A2, COL5A1, MMP2, COL6A2, PXDN, COL6A3, OLFML2A, ADAMTS7, FBN1	83	268	18224	8.19277	0.000481184	0.000134501	0.000129988
GOTERM_CC_DIRECT	GO:0005581~collagen trimer	GO:0005581	7	8.04598	3.61077e-06	COL1A1, COL3A1, COL1A2, COL5A1, COL6A2, COL12A1, COL6A3	83	92	18224	16.7061	0.000537861	0.000134501	0.000129988
GOTERM_CC_DIRECT	GO:0005576~extracellular region	GO:0005576	22	25.2874	6.14311e-06	DHRS13, NOTCH3, SPARC, MMP2, F2R, COL12A1, RFNG, NID2, FSTL1, COL1A1, COL3A1, TF, PROC, COL1A2, COL4A2, COL5A1, COL4A1, COL6A2, LCN12, COL6A3, IGFBP7, FBN1	83	1610	18224	3.00028	0.000914907	0.000183065	0.000176921
GOTERM_CC_DIRECT	GO:0005615~extracellular space	GO:0005615	19	21.8391	2.39218e-05	SPARC, MCAM, MMP2, COL12A1, FSTL1, LOXL2, COL1A1, COL3A1, TF, PROC, COL1A2, COL6A2, DPYSL3, PXDN, COL6A3, IGFBP7, JAM3, CCL15, FBN1	83	1347	18224	3.09707	0.00355804	0.000594057	0.000574122
GOTERM_CC_DIRECT	GO:0005604~basement membrane	GO:0005604	6	6.89655	2.83062e-05	SPARC, COL5A1, COL4A1, NID2, LOXL2, FBN1	83	79	18224	16.6759	0.0042088	0.000602518	0.000582299
GOTERM_CC_DIRECT	GO:0005584~collagen type I trimer	GO:0005584	2	2.29885	0.00897912	COL1A1, COL1A2	83	2	18224	219.566	0.739182	0.158012	0.15271
GOTERM_CC_DIRECT	GO:0014069~postsynaptic density	GO:0014069	5	5.74713	0.00954436	SYT11, MAP1B, BNIP3, CACNA1C, DCLK1	83	184	18224	5.96647	0.760437	0.158012	0.15271
GOTERM_CC_DIRECT	GO:1903561~extracellular vesicle	GO:1903561	3	3.44828	0.021308	COL6A2, COL12A1, COL6A3	83	50	18224	13.174	0.959611	0.3038	0.293605
GOTERM_CC_DIRECT	GO:0070062~extracellular exosome	GO:0070062~extracellular exosome	21	24.1379	0.0224282	MPST, FAM26E, COL12A1, RFNG, PCDH12, ANTXR1, NID2, FSTL1, TF, COL1A2, COL4A2, COL5A1, COL6A2, RHOJ, PXDN, COL6A3, IGFBP7, ESAM, VIM, MXRA5, FBN1	83	2811	18224	1.6403	0.965947	0.3038	0.293605
GOTERM_CC_DIRECT	GO:0005587~collagen type IV trimer	GO:0005587~collagen type IV trimer	2	2.29885	0.0266991	COL4A2, COL4A1	83	6	18224	73.1888	0.982265	0.331514	0.320389
GOTERM_CC_DIRECT	GO:0009986~cell surface	GO:0009986~cell surface	6	6.89655	0.0972829	TF, SPARC, CD93, F2R, ANTXR1, ADAMTS7	83	542	18224	2.43062	1	1	0.972973

## Sheet: GO_MF
Category	Term	GOID	Count	%	PValue	Genes	List Total	Pop Hits	Pop Total	Fold Enrichment	Bonferroni	Benjamini	FDR
GOTERM_MF_DIRECT	GO:0005201~extracellular matrix structural constituent	GO:0005201	8	9.1954	2.6019e-08	COL1A1, COL3A1, COL1A2, COL4A2, COL5A1, COL4A1, PXDN, FBN1	80	67	16881	25.1955	4.55332e-06	4.55333e-06	4.55333e-06
GOTERM_MF_DIRECT	GO:0048407~platelet-derived growth factor binding	GO:0048407	5	5.74713	1.42981e-07	COL1A1, COL3A1, COL1A2, COL5A1, COL4A1	80	11	16881	95.9148	2.50213e-05	1.25108e-05	1.25108e-05
GOTERM_MF_DIRECT	GO:0005509~calcium ion binding	GO:0005509	10	11.4943	0.0061923	NOTCH3, SPARC, PROC, CD93, VSNL1, SYT11, PCDH12, NID2, FSTL1, FBN1	80	717	16881	2.94299	0.662781	0.361217	0.361217
GOTERM_MF_DIRECT	GO:0005178~integrin binding	GO:0005178	4	4.5977	0.0131389	COL3A1, COL5A1, JAM3, FBN1	80	105	16881	8.03857	0.901188	0.574825	0.574825
GOTERM_MF_DIRECT	GO:0030023~extracellular matrix constituent conferring elasticity	GO:0030023	2	2.29885	0.0231838	COL4A1, FBN1	80	5	16881	84.405	0.983509	0.811434	0.811434
GOTERM_MF_DIRECT	GO:0005518~collagen binding	GO:0005518	3	3.44828	0.032133	SPARC, ANTXR1, NID2	80	60	16881	10.5506	0.996706	0.937213	0.937213
GOTERM_MF_DIRECT	GO:0008201~heparin binding	GO:0008201	4	4.5977	0.0391636	COL5A1, FSTL1, CCL15, FBN1	80	160	16881	5.27531	0.99908	0.979089	0.979089
GOTERM_MF_DIRECT	GO:0042803~protein homodimerization activity		8	9.1954	0.0544694	MLXIPL, SYT11, BNIP3, DPY30, TCF4, HNF1A, OLFML2A, JAM3	80	730	16881	2.31247	0.999945	1	1
GOTERM_MF_DIRECT	GO:0046982~protein heterodimerization activity		6	6.89655	0.0667784	MLXIPL, MEF2C, BNIP3, TCF4, HNF1A, JAM3	80	465	16881	2.72274	0.999994	1	1
GOTERM_MF_DIRECT	GO:0031369~translation initiation factor binding		2	2.29885	0.0938636	EIF2B4, SYT11	80	21	16881	20.0964	1	1	1
GOTERM_MF_DIRECT	GO:0008198~ferrous iron binding		2	2.29885	0.0981094	TF, HEPH	80	22	16881	19.183	1	1	1

## Sheet: KEGG
Category	Term	KEGGID	Count	%	PValue	Genes	List Total	Pop Hits	Pop Total	Fold Enrichment	Bonferroni	Benjamini	FDR
KEGG_PATHWAY	hsa04974:Protein digestion and absorption	hsa04974	9	10.3448	1.85756e-08	COL1A1, COL3A1, COL1A2, COL4A2, COL5A1, COL4A1, COL6A2, COL12A1, COL6A3	39	88	6879	18.0393	1.39317e-06	1.39317e-06	1.37459e-06
KEGG_PATHWAY	hsa04512:ECM-receptor interaction	hsa04512	8	9.1954	3.72432e-07	COL1A1, COL3A1, COL1A2, COL4A2, COL5A1, COL4A1, COL6A2, COL6A3	39	87	6879	16.2193	2.7932e-05	1.39662e-05	1.378e-05
KEGG_PATHWAY	hsa04510:Focal adhesion	hsa04510	8	9.1954	0.000111715	COL1A1, COL3A1, COL1A2, COL4A2, COL5A1, COL4A1, COL6A2, COL6A3	39	206	6879	6.84989	0.0083441	0.00279288	0.00275564
KEGG_PATHWAY	hsa05146:Amoebiasis	hsa05146	6	6.89655	0.000264695	COL1A1, COL3A1, COL1A2, COL4A2, COL5A1, COL4A1	39	106	6879	9.98403	0.019659	0.00496304	0.00489686
KEGG_PATHWAY	hsa04151:PI3K-Akt signaling pathway	hsa04151	9	10.3448	0.000480116	COL1A1, COL3A1, COL1A2, COL4A2, COL5A1, COL4A1, COL6A2, F2R, COL6A3	39	345	6879	4.60134	0.0353765	0.00720175	0.00710572
KEGG_PATHWAY	hsa04611:Platelet activation	hsa04611	5	5.74713	0.00546728	COL1A1, COL3A1, COL1A2, COL5A1, F2R	39	130	6879	6.78402	0.337126	0.0683409	0.0674297
KEGG_PATHWAY	hsa04022:cGMP-PKG signaling pathway	hsa04022	4	4.5977	0.0558564	MEF2C, EDNRA, MRVI1, CACNA1C	39	158	6879	4.46543	0.986577	0.598461	0.590482
